# Supplementary material for: Effect of bed net colour and shape preferences on bed net usage: a secondary data analysis of the 2017 Malawi Malaria Indicator Survey
Source: Springer Nature journal article supplement (doi:10.1186/s12936-020-03499-9), 2020-11-23

PrefShape = Conical.

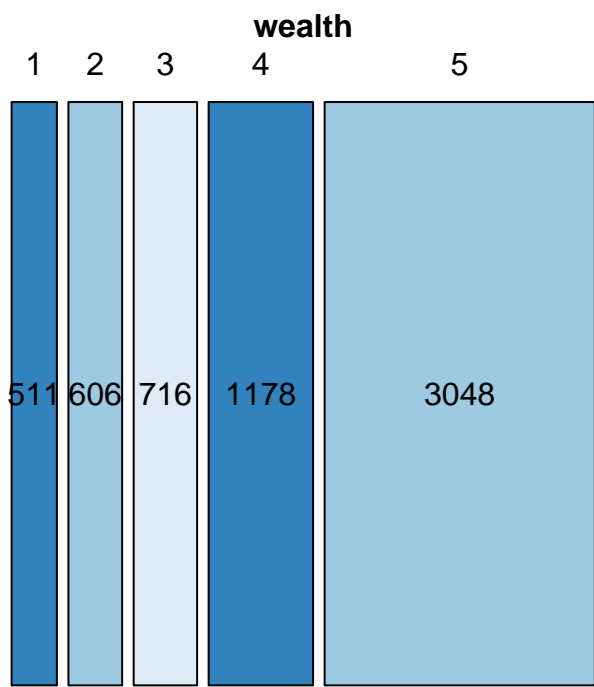

PrefShape = Rectang.

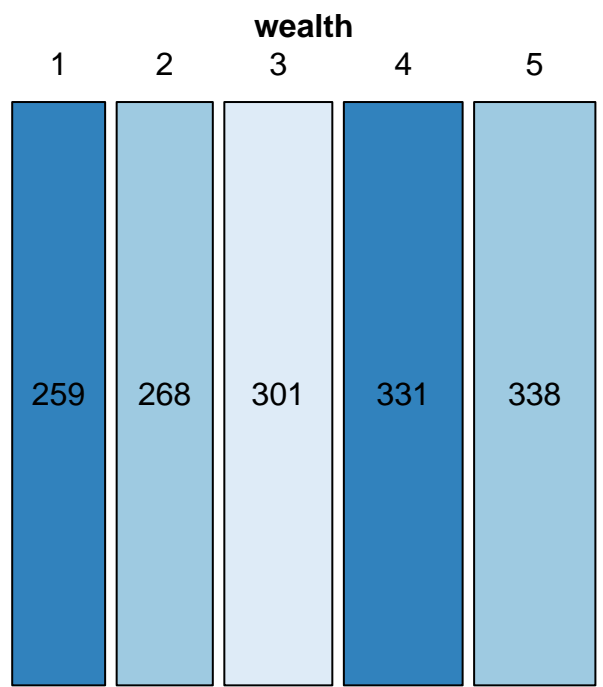

PrefShape = NoPref

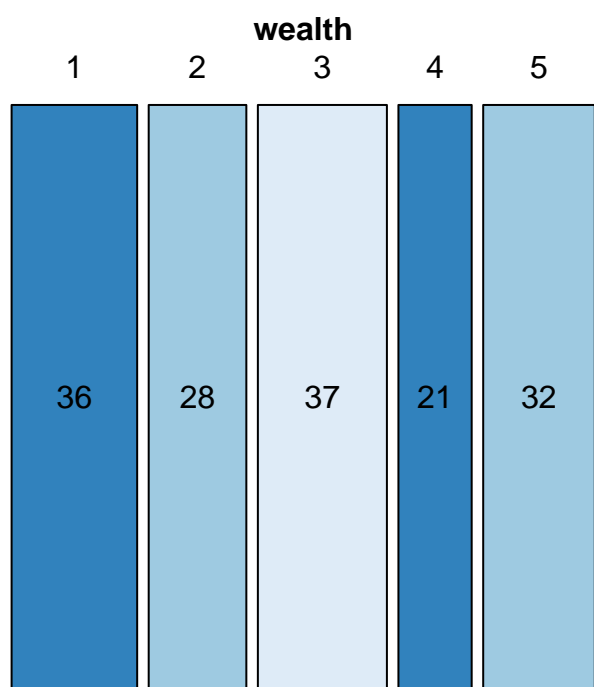

Supplement: MOESM2 [file 18615816]
